# Supplementary material
Source: PubMed Central journal article supplement (PMC1717021)
Supplement: NIHMS14614-supplement-SOM.pdf [file NIHMS14614-supplement-SOM.pdf]

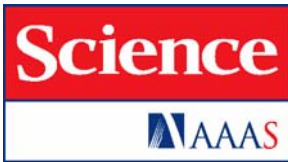

## Supporting Online Material for

### Aneuploidy and Isochromosome Formation in Drug-Resistant *Candida albicans*

Anna Selmecki, Anja Forche, and Judith Berman\*

\*To whom correspondence should be addressed. E-mail: [jberman@umn.edu](mailto:jberman@umn.edu)

Published 21 July 2006, *Science* **313**, 367 (2006).

DOI: 10.1126/science.1128242

#### **This PDF file includes**

Materials and Methods

Fig. S1

Tables S1 to S3

References

## Science Supporting Online Material

### Materials and Methods

#### *Comparative genome hybridization arrays*

CGH was performed as described previously (S1). All test strains were compared to the reference control strain, SC5314. Briefly, digested genomic DNA from the test strain and SC5314 were differentially labeled with Cy3-dUTP and Cy5-dUTP (Roche), respectively. DNAs were mixed in a 1:1 ratio and co-hybridized to a whole genome *C. albicans* microarray printed in our lab. Fluorescence intensity ratios (mean log<sub>2</sub> values) were obtained and analyzed using GenePixPro 5.1 and GeneTraffic 3.1.

#### *Chromosome\_map plots*

A Matlab program was used to plot all microarray data points as function of their chromosome location as described previously (S1). All CGH data were plotted on a log<sub>2</sub> scale and clipped to the range corresponding to 1-4 gene copies. Expression data (Fig. 1C) were not clipped but instead plotted as a running average over 5 sequential ORFs (S2).

#### *Fluconazole susceptibility testing*

Minimal inhibitory concentrations (MIC) were determined using fluconazole E-test strips (0.016–256 µg/ml, AB Biodisk) on Casitone-agar plates. Overnight YPAD cultures were diluted in sterile 0.85% NaCl to an OD<sub>600</sub> of 0.01 and plated using a sterile cotton swab. Etest strips were applied and plates were incubated at 35°C for 48 hours. The susceptibility endpoint was read at the first growth-inhibition ellipse. Strains with MIC values of 4 µg/ml and above were considered resistant to fluconazole.

#### *Contour-clamped homogenous electric field (CHEF) electrophoresis*

Whole-chromosome analysis was done as described previously (S1). Sfi I-digested chromosomes (S3) were separated on a 1% agarose gel (Megabase Agarose, Bio-Rad) in 0.5X TBE, using a CHEF DRIII (Bio-Rad) apparatus with the following conditions: 7- to 100-s switch, 4.5 V·cm<sup>-1</sup>, 120° angle, for 21 hours, followed by 80- to 400-s switch, 3.5 V·cm<sup>-1</sup>, 120° angle, for 21 hours. Southern hybridization was done as described below.

#### *Southern hybridization*

Genomic DNA (10 µg) was digested overnight with the restriction enzymes Eco NI and Sac I. Samples were run on a 0.8% agarose gel. DNA was transferred to Magnacharge nylon membranes (Osmonics), which were then probed and detected as described previously (S1). PCR probes (Table S2) were labeled with DIG-11-dUTP according to manufacturer's instructions (Roche).

#### *Sequence analysis of Chromosome 5*

To sequence the gap between contig 19.10170 and 19.10202, genomic DNA from two strains homozygous for chr5, 4448 and 4449 (S4), was amplified using primer pairs 2003/1990 and 1991/1915 (Fig. S1 and Table S2). All primers were within unique, non-repetitive DNA. Sequencing of PCR products was carried out at the AGAC Sequencing Facility at the University of Minnesota. Sequence analysis and alignment of allelic sequences was performed using Sequencher software, version 4.2 (Gene Codes Corp., Ann Arbor, MI).

**Fig. S1.** Sequence spanning the gap between contigs 19.10170 and 19.10202 in Assembly 19 of the *C. albicans* genome sequence (S5–S7), including 50 bp on either side of the gap. Polymorphic base positions for the alleles are designated as follows: Y = C/T, W = A/T, R = A/G.

GTTTATTGTGGCCCATTTAACTGAACCAAAGCGTGTACAGACTTGGCA  
TGTGTGGATTTGCAGATTTGAATTTTCGGGTTGTTACTCAACCGTTAACT  
GAGACAATGCTGCTAACGAGTATTTCCCCGATCCAGTGTGAATGAAA  
AGTGTGGAAAATTTTGTTCAGTTGGTAGAAGTGGTACTGTTAGCTAA  
GGCAAGATGTTGTGAAAYCATCAATACCATAGGGAAGACTGATAGCT  
GGAGATGTTYCAATTGGTCTTGATGATTGCAGCTATCTCAATAATTAT  
CTAGGTATCAGTCCAAGAAAAGTTYTCTTAAGGAAGATGGGGTGGAG  
AACGAGTAGCTCGGCTTTGARATGAACTTGCAATGTTTCATGGTCGCT  
TTTTGTCTTAAAGAAATACTCTCATCTTGCTTCTCAATTATGTATGGAA  
TGYRGATTTTGTGAACTGCTGCTCATTGATTTTGACCGACTTGCTGTT  
ATTCTGAGTAGARAAATTTACCAGCAATTGTGTGTGTGTCTGTGTGTGT  
TTTTTTTTTGAAAATGTGAAGTTGGCTAGTTTCATTATTGCAGYGTCTT  
GTCCTCGACATAAACAGCCTAGTGATAATAAGTGTGAAGAGTAGTAAT  
TGAAGTTTGGTGTGTCTAGGTGGTGTTTAAGACTGTTTAGTATTTTCGC  
AAGAATTTTGTTAACTTTGTGTGTATAAAAATTCCTCAGCTACAGTTTCT  
ACTTTTCCCACAGACAATAGCCCACTAGATTATCTCAATATTA ACTCTA  
AAACATTTTCTTCAGTTCTCACTATTAGACAAAGGGAAGTTTCTCTTT  
GATAAGYCCTTCTCCTGTGAAAAGTTTCGAGATGTAACGTTTCGCAGT  
AATAGAGAGCCAGAATCCATTTTGTGTACTACAGACAAATTCAGAAG  
TTTCAACTGCTGCATATCGCCTTAAATGACTGTAGCATTTCGTCCAAATT  
GAGACCCTCAATTACATTTTGTCAAAAAAATTGGTCCCTAGTGTGCT  
ATCGATAACGAAGGTGAAGGCAGTTTAGCTTGGAGRCATTTAGAGAA  
CTTAGTTACATCTCATCTTCCGTTTCGAGAAATCGTTGATTTACCGTGC  
AGCGCTTATATTGATTGCTACTTGTTCACAGCACCACAGCAATATAGC  
AATCWTAATAAATTGCCCGCGGTTGACAGTGTATATCTTCGAGGAA  
TGGCAACCTTTGCCCC

**Table S1.** Strains used in this study. Copy number of *MTL* alleles was estimated from CGH array data. *MTL* status: Among the 8 strains with i(5L) were two independent events in which *MTL* became homozygous. Notably, none of the i(5L) strains had equal numbers of *MTLa* and *MTL $\alpha$*  alleles. This suggests that i(5L) formation is accompanied by homozygosis of the *MTL* locus and, perhaps, homozygosis of other genes on chr5L as well. For consistency, MIC values were reassessed for all strains using E-test strips.

| Strain number | Strain ID | <i>MTL</i> status                         | MIC ( $\mu$ g/ml) | Strain source |
|---------------|-----------|-------------------------------------------|-------------------|---------------|
| YJB2348       | SC5314    | a/ $\alpha$                               | 0.75              | (8)           |
| 4448          | SC5314    | a/a                                       | 0.75              | (4)           |
| 4449          | SC5314    | $\alpha$ / $\alpha$                       | 0.75              | (4)           |
| YJB9613       | T118(N0)  | a/ $\alpha$                               | 0.25              | (9)           |
| YJB8741       | N4-330    | a/ $\alpha$                               | 0.25              | (9)           |
| YJB8734       | D8-330    | a/ $\alpha$                               | 4                 | (9)           |
| YJB8735       | D9-165    | a/a/a/ $\alpha$                           | 6                 | (9)           |
| YJB8736       | D9-330    | a/a/ $\alpha$                             | 64                | (9)           |
| YJB8737       | D11-330   | a/a/a/ $\alpha$                           | 64                | (9)           |
| YJB8738       | D12-165   | a/ $\alpha$ / $\alpha$ / $\alpha$         | 8                 | (9)           |
| YJB8739       | D12-260   | a/ $\alpha$                               | 64                | (9)           |
| YJB8740       | D12-330   | a/ $\alpha$                               | 4                 | (9)           |
| YJB9309       | DSY2285   | a/ $\alpha$                               | 0.25              | (10)          |
| YJB9311       | DSY2286   | a/ $\alpha$ / $\alpha$ / $\alpha$         | 16                | (10)          |
| YJB9175       | S315      | a/a                                       | >64               | (11)          |
| YJB9180       | P39       | a/a/a/a                                   | >256              | (11)          |
| YJB8638       | FH1       | a/ $\alpha$                               | 2                 | (12)          |
| YJB9185       | FH5       | $\alpha$ / $\alpha$ / $\alpha$ / $\alpha$ | >256              | (12)          |
| YJB8640       | FH8       | $\alpha$ / $\alpha$ / $\alpha$ / $\alpha$ | 64                | (12)          |

**Table S2.** Primers used in this study. F, Forward; R, reverse.

| Primer ID         | Primer description        | Sequence (5' to 3')  |
|-------------------|---------------------------|----------------------|
| Sequencing*       |                           |                      |
| 2003              | F                         | CAGTCGGGCGATTATCT    |
| 1990              | R                         | TTGACGAACGTAGGGACCGT |
| 1992              | F                         | TGGCCGCAACGTAATCTATG |
| 1915              | R                         | CAGCCTTTGAGCCCTATT   |
| Southern analysis |                           |                      |
| 1925              | Probe L-F                 | GAATTGCCGTTCCGATTG   |
| 1926              | Probe L-R                 | CCGCAAATGCTTGCTCTT   |
| 1910              | Probe R-F                 | CCAGACCCCTGCCTCTTT   |
| 1909              | Probe R-R                 | AGTTGGATGCGTTGGTCC   |
| 2251              | Probe I-F                 | GGCGGTACACCTGCTGTT   |
| 2252              | Probe I-R                 | TTCAGCGGCTTCAGGAAC   |
| 2010              | Cse4-Probe-F              | TACTTCTGGTCAACGAGGCT |
| 2011              | Cse4-Probe-R              | GACTGACATCCGTACTATCG |
| 2203              | Telomere adjacent Probe-F | CCCATCGACCACCCATTA   |
| 2204              | Telomere adjacent Probe-R | GGCGTCGATTTTGGGAATG  |

\*Primers used for sequencing across the chr5 gap.

**Table S3.** The presence of i(5L) isochromosome is correlated with maintenance of high levels of Flu<sup>R</sup>. Independent isolates derived from YJB9185 (parent) were tested for fluconazole resistance using E-strip assays. Isolate 1 is YJB9517 shown in Fig. 3. The presence of i(5L) was detected on Southern blots of CHEF gels containing undigested chromosomes and probed for i(5L) as in Fig. 2C.

| Isolate | MIC (µg/ml) | i(5L) present? |
|---------|-------------|----------------|
| Parent  | >256        | Yes            |
| 1       | 8           | No             |
| 2       | >256        | Yes            |
| 3       | 16          | No             |
| 4       | >256        | Yes            |
| 5       | >256        | Yes            |
| 6       | >256        | Yes            |
| 7       | >256        | Yes            |
| 8       | >256        | Yes            |
| 9       | 16          | No             |

## References and Notes

- S1. A. Selmecki, S. Bergmann, J. Berman, *Molecular Microbiology* **55**, 1553 (2005).
- S2. T. R. Hughes *et al.*, *Nat Genet* **25**, 333 (2000).
- S3. W. S. Chu, B. B. Magee, P. T. Magee, *J of Bacteriol* **175**, 6637 (1993).
- S4. A. S. Ibrahim *et al.*, *Infection and Immunity* **73**, 7366 (2005).
- S5. B. R. Braun *et al.*, *PLoS Genet* **1** (2005).
- S6. <http://candida.bri.nrc.ca/candida/index.cfm>.
- S7. T. Jones *et al.*, *Proc Natl Acad Sci U S A* **101**, 7329 (2004).
- S8. K. Yagishita, H. Jinnouchi, H. Yamamoto, *Jpn J Antibiot* **34**, 1485 (Nov, 1981).
- S9. L. E. Cowen *et al.*, *J Bacteriol* **182**, 1515 (2000).
- S10. M. Karababa, A. T. Coste, B. Rognon, J. Bille, D. Sanglard, *Antimicrob Agents Chemother* **48**, 3064 (2004).
- S11. T. R. Rustad, D. A. Stevens, M. A. Pfaller, T. C. White, *Microbiology* **148**, 1061 (2002).
- S12. K. A. Marr, T. C. White, J. A. van Burik, R. A. Bowden, *Clinical Infectious Diseases* **25**, 908 (1997).
